# Supplementary material for: Spent Hen Muscle Protein-Derived RAS Regulating Peptides Show Antioxidant Activity in Vascular Cells
Source: MDPI journal article supplement (doi:10.3390/antiox10020290), 2021-02-15
Supplement: s1 [file s1]

Supplementary materials:

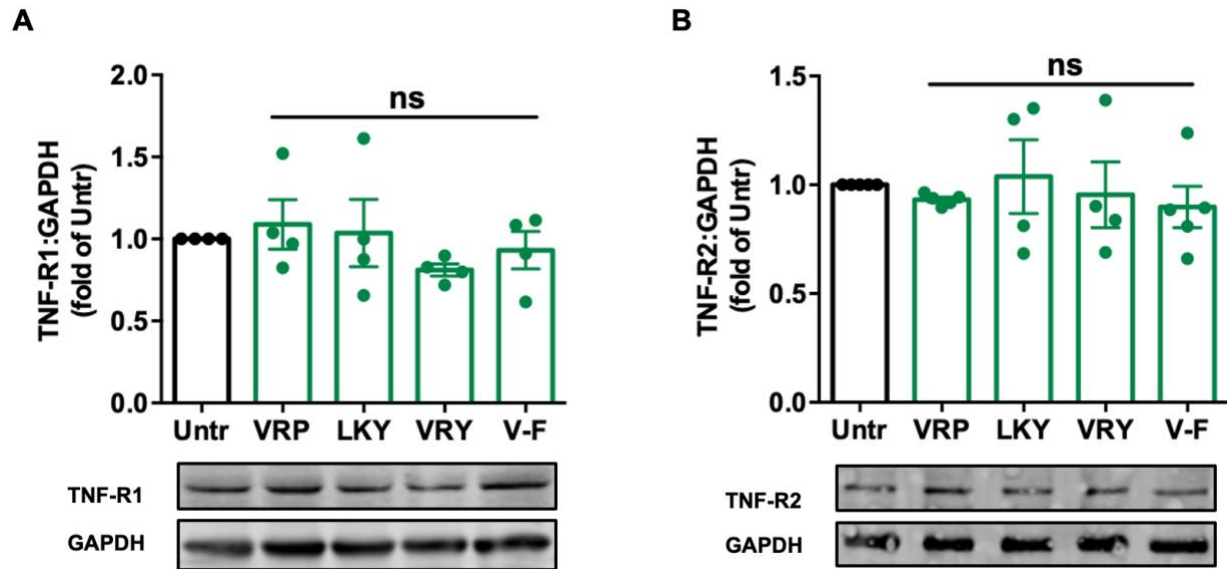

**Figure S1.** Effect of VRP, LKY, VRY and V-F (50  $\mu$ M) for 48 h on expressions of TNF-R1 (A) and TNF-R2 (B) in ECs. Protein bands were quantified by densitometry and normalized to GAPDH. Data were expressed as means  $\pm$  SEMs of 4-5 independent experiments and normalized to the untreated group (Untr). ns, not significant ( $p > 0.05$ ), as compared with the untreated group.
